# Supplementary material for: A duck RH panel and its potential for assisting NGS genome assembly
Source: PubMed Central journal article supplement (PMC3496577; doi:10.1186/1471-2164-13-513), 2012-09-28
Supplement: 1471-2164-13-513-S2.pdf [file 1471-2164-13-513-S2.pdf]

## 13 Largest scaffolds > 4 Mb

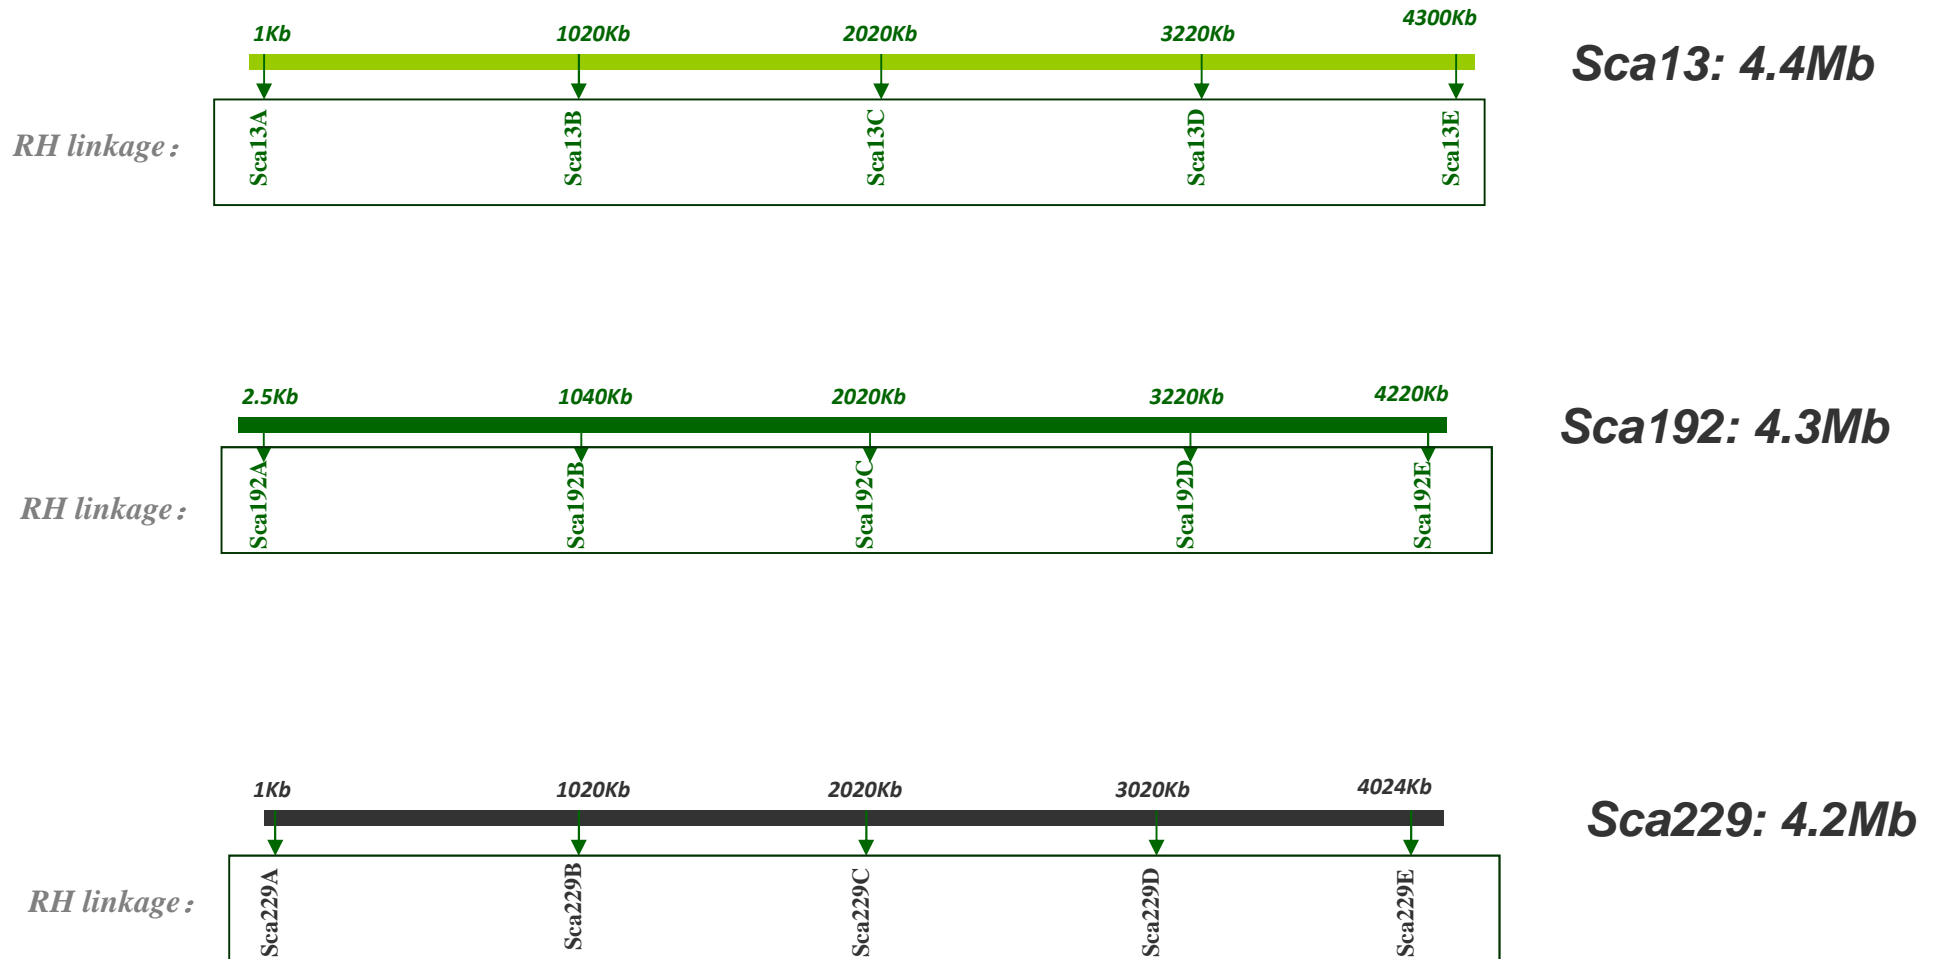

Markers scaXXX... contained in the same box are linked together by RH mapping.

# 13 Largest scaffolds > 4 Mb

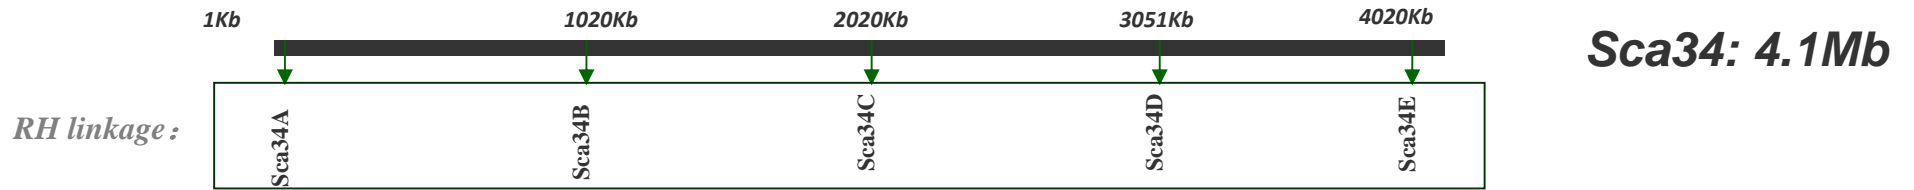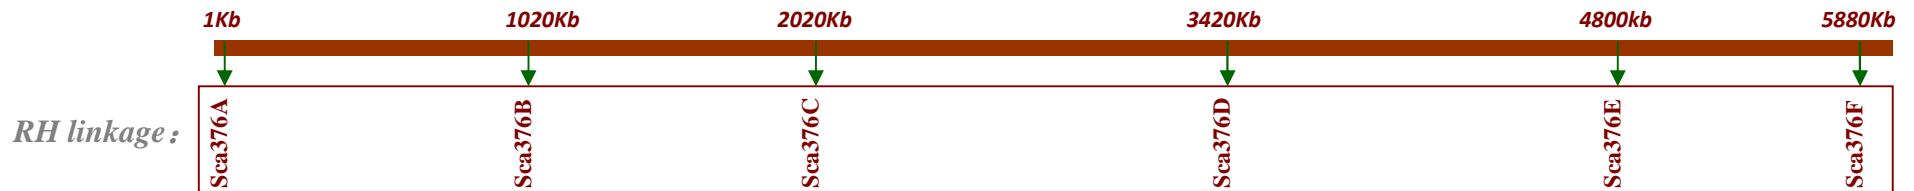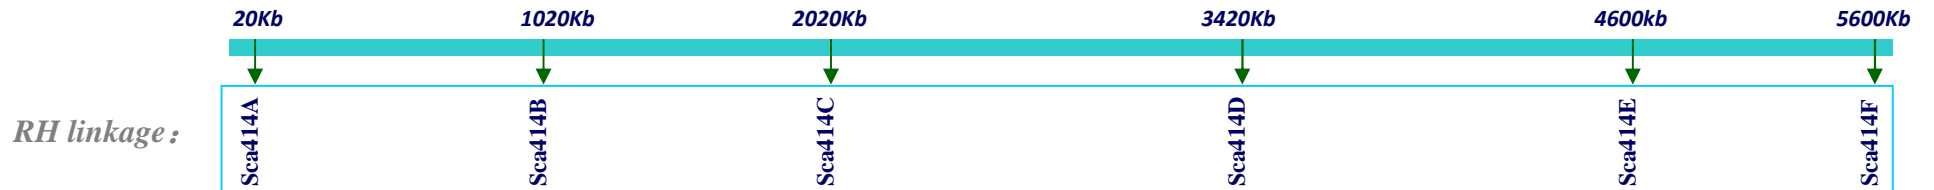

## 13 Largest scaffolds > 4 Mb

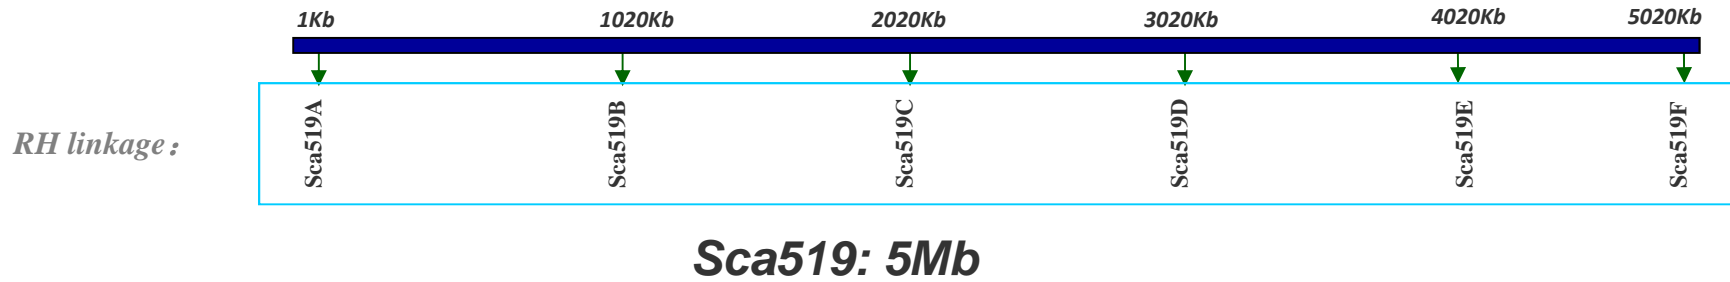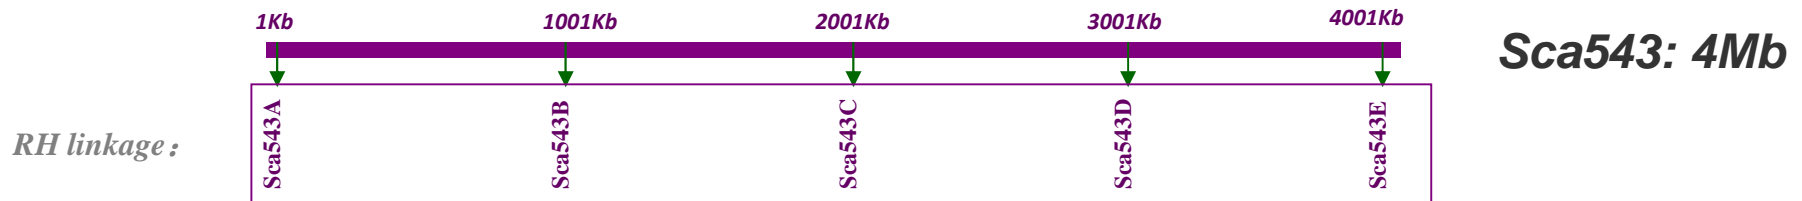

## 13 Largest scaffolds > 4 Mb

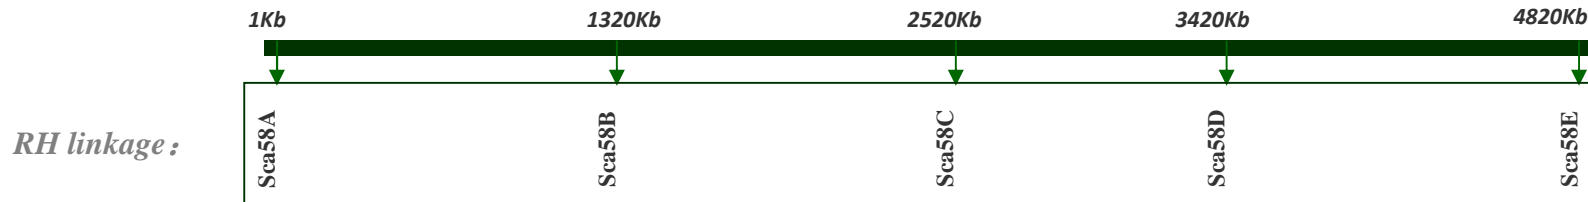

**Sca58: 4.9Mb**

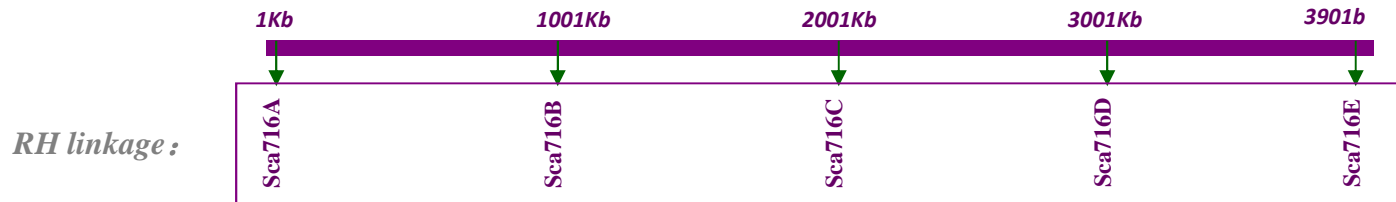

**Sca716: 4Mb**

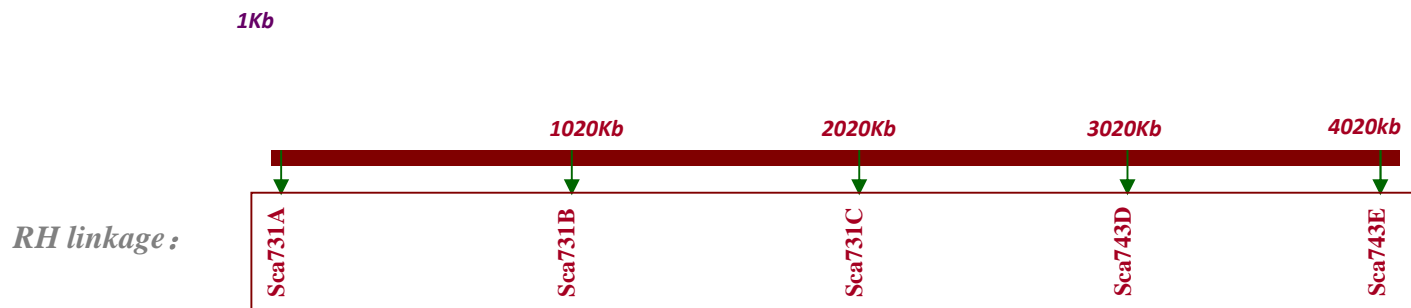

**Sca731: 4.1Mb**

## 13 Largest scaffolds > 4 Mb

*RH linkage :*

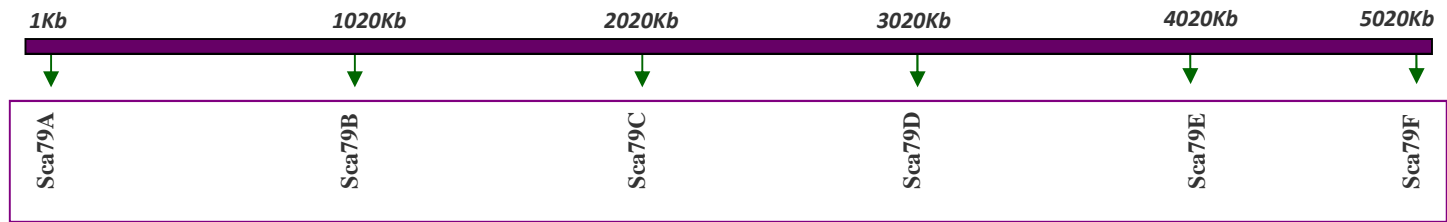

**Sca79: 5.1Mb**

## 13 Largest scaffolds > 4 Mb

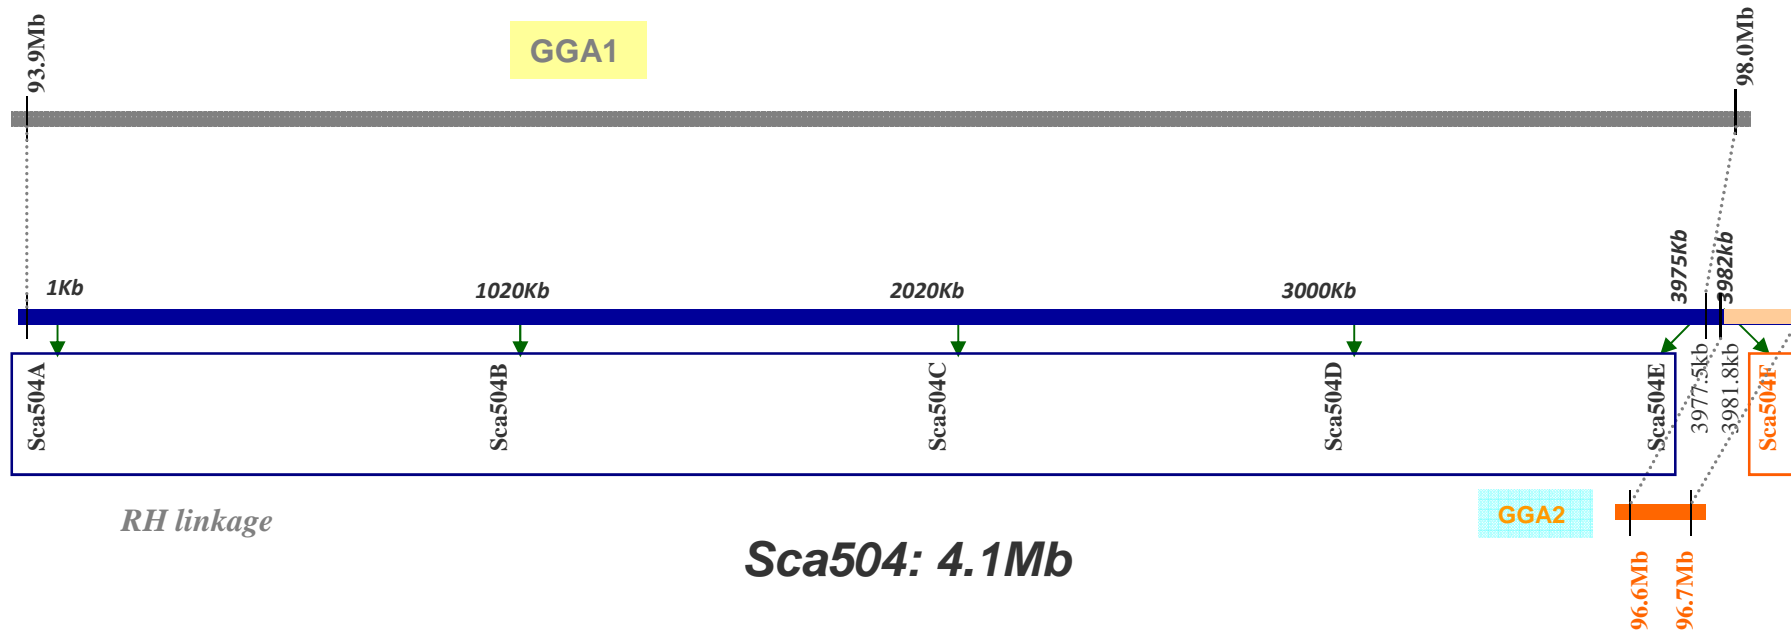

Markers sca504A, sca504B, sca504C, sca504D and sca504E are linked together by RH mapping, whereas marker sca504F is not linked, suggesting the end of the scaffold is misassembled.
