# Supplementary material for: A duck RH panel and its potential for assisting NGS genome assembly
Source: PubMed Central journal article supplement (PMC3496577; doi:10.1186/1471-2164-13-513), 2012-09-28
Supplement: 1471-2164-13-513-S3.pdf [file 1471-2164-13-513-S3.pdf]

# Duck scaffolds aligning to two chicken chromosomes

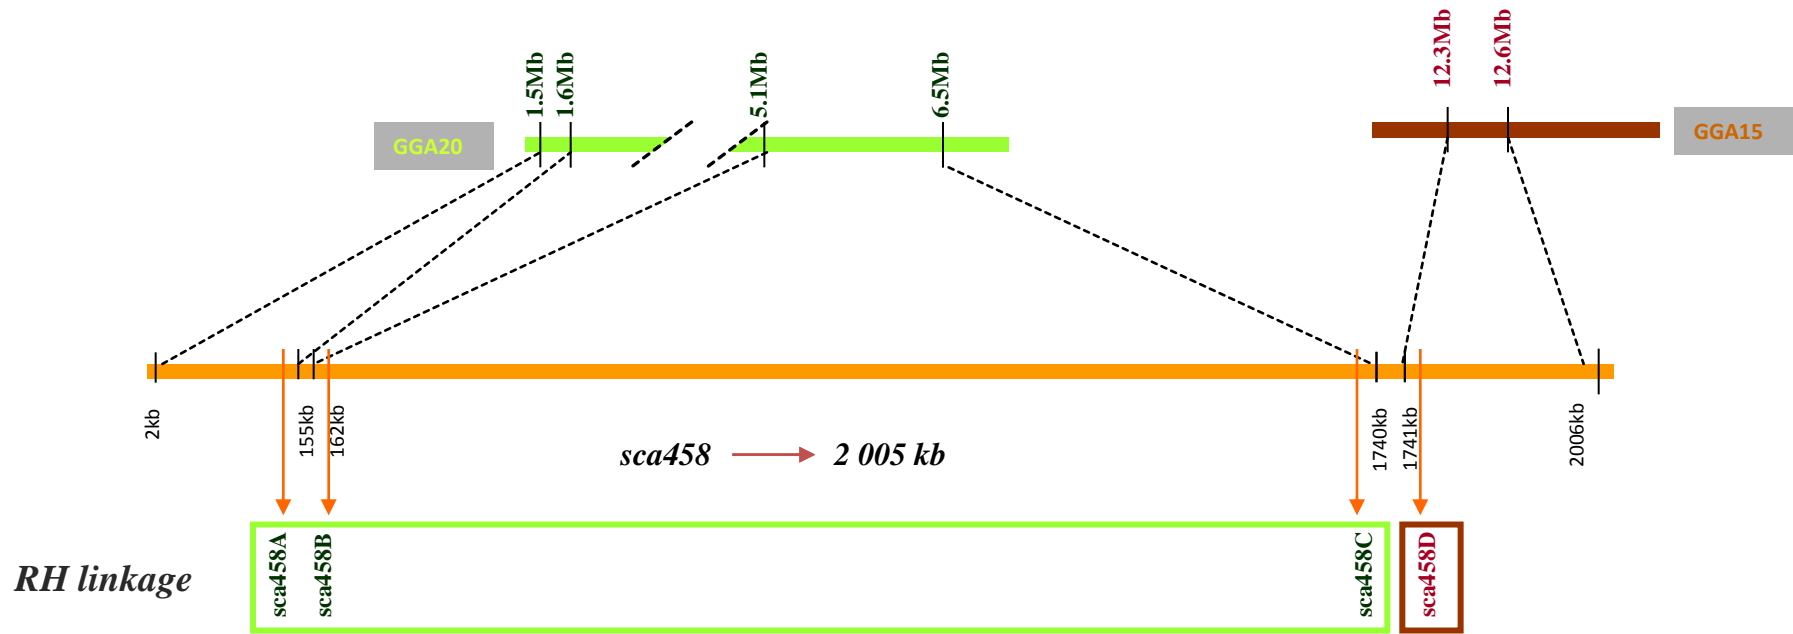

Markers scaXXX... contained in the same box are linked together by RH mapping.

# Duck scaffolds aligning to two chicken chromosomes

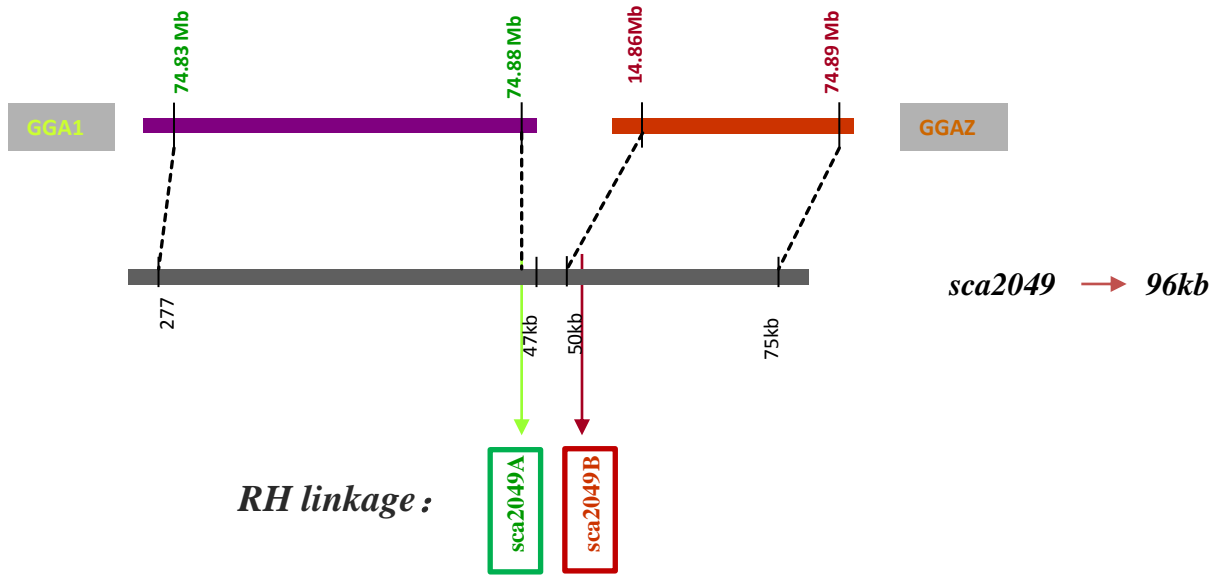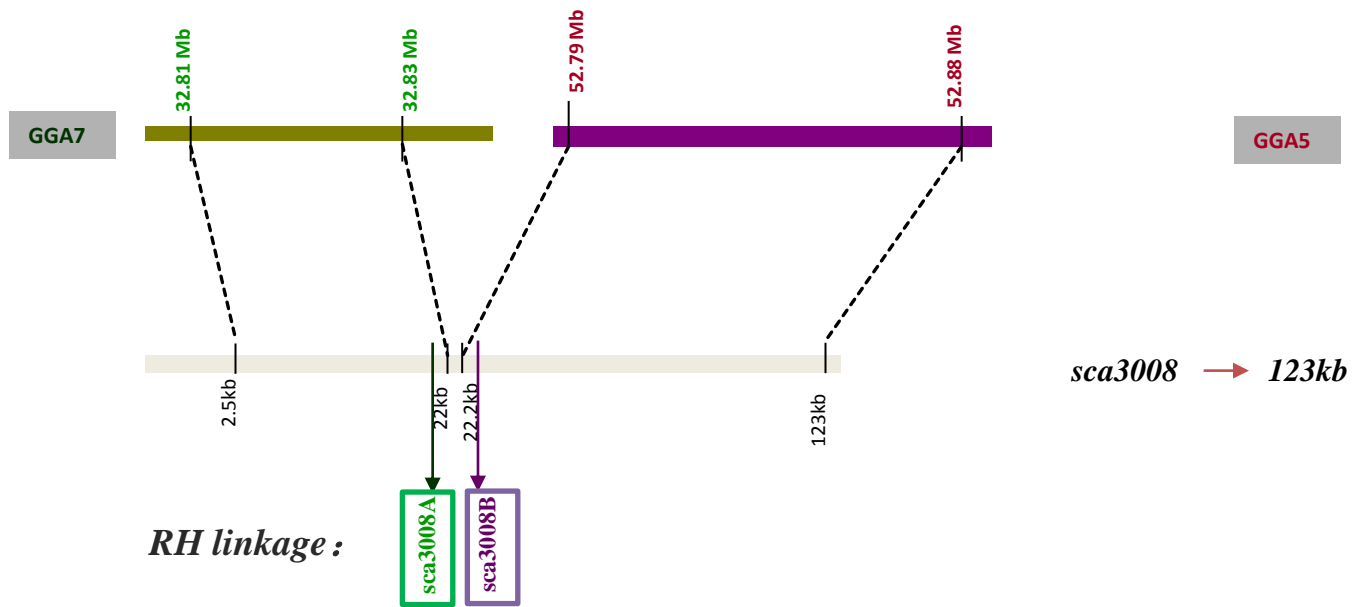

# Duck scaffolds aligning to two chicken chromosomes

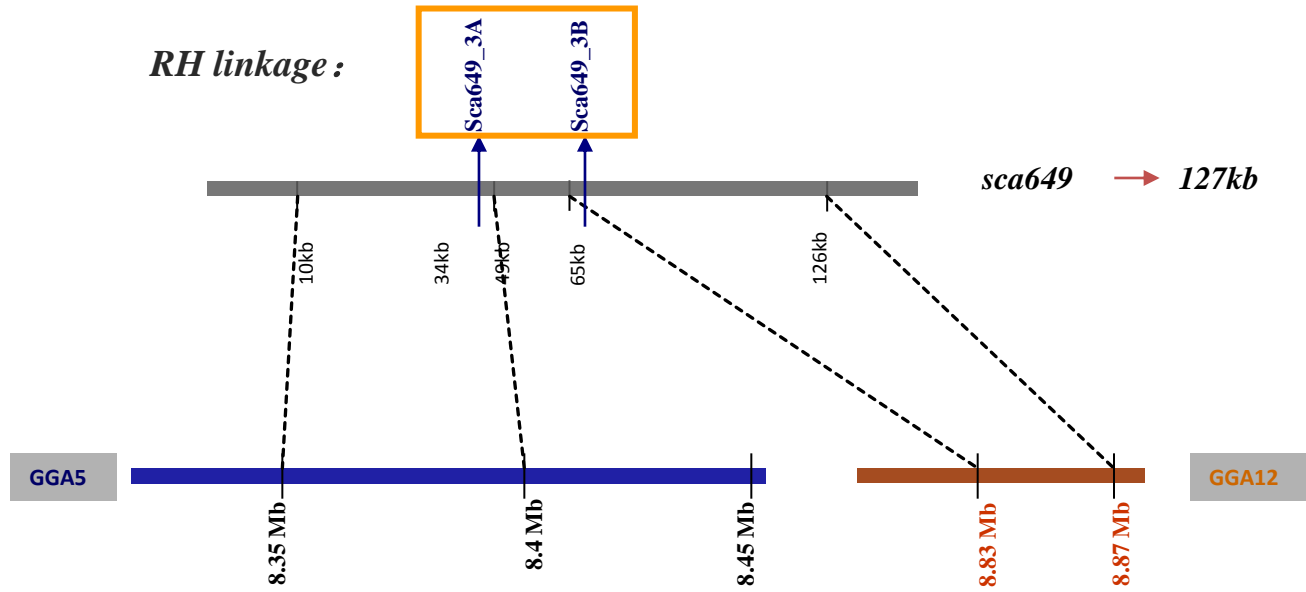

# Duck scaffolds aligning to two chicken chromosomes

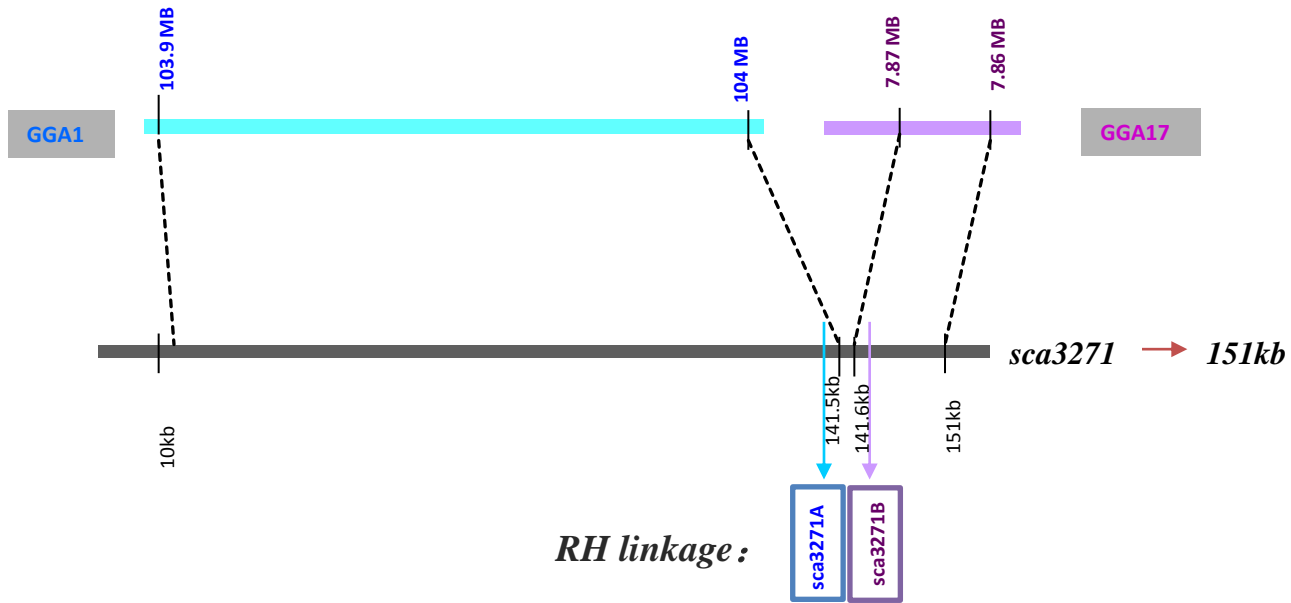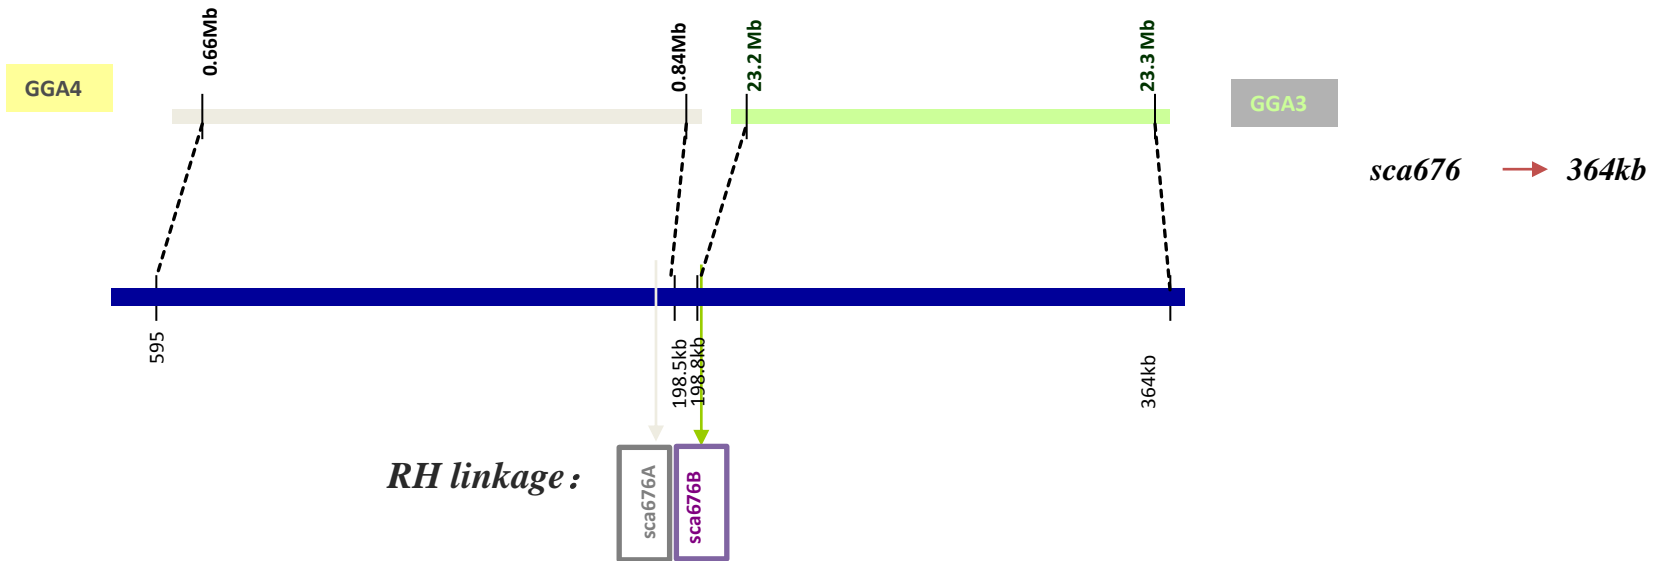

# Duck scaffolds aligning to two chicken chromosomes

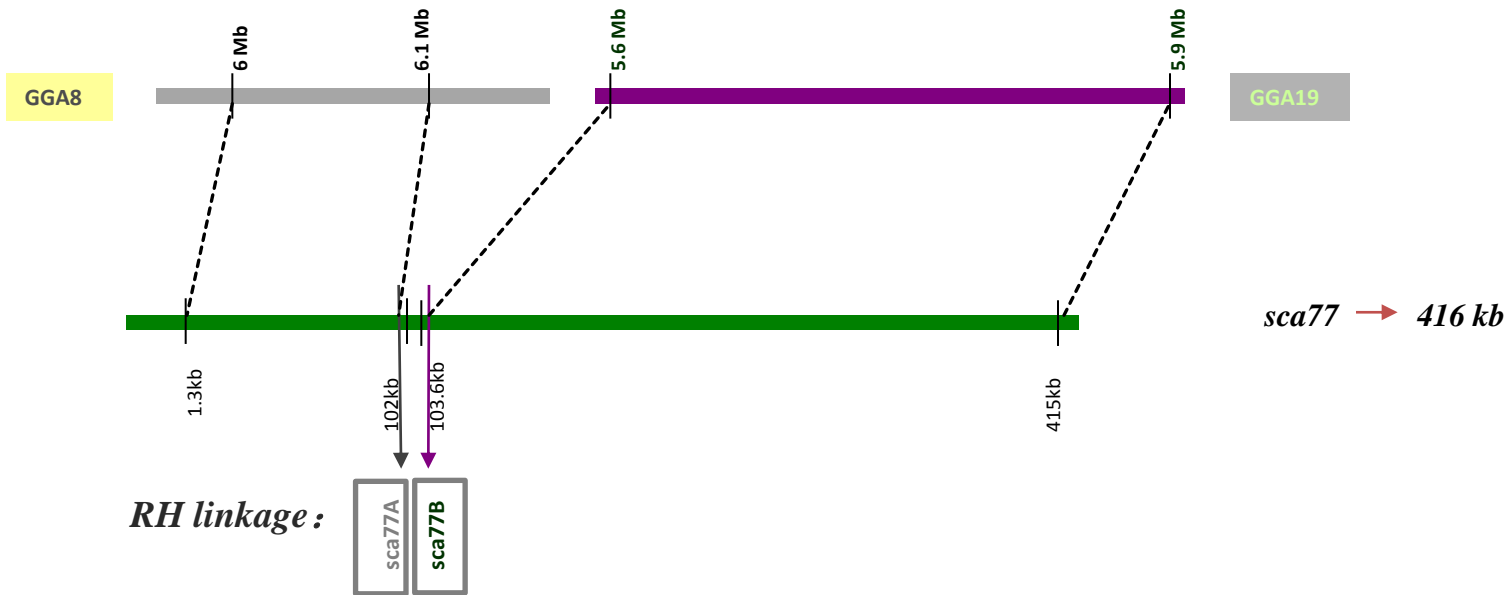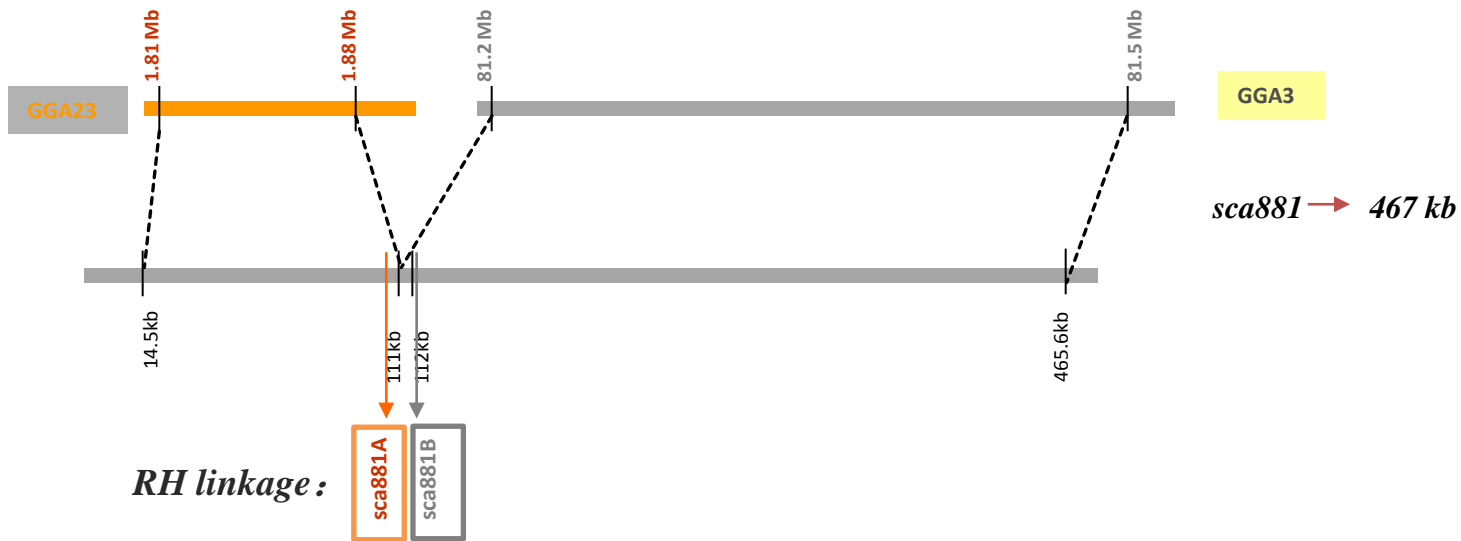

# Duck scaffolds aligning to two chicken chromosomes

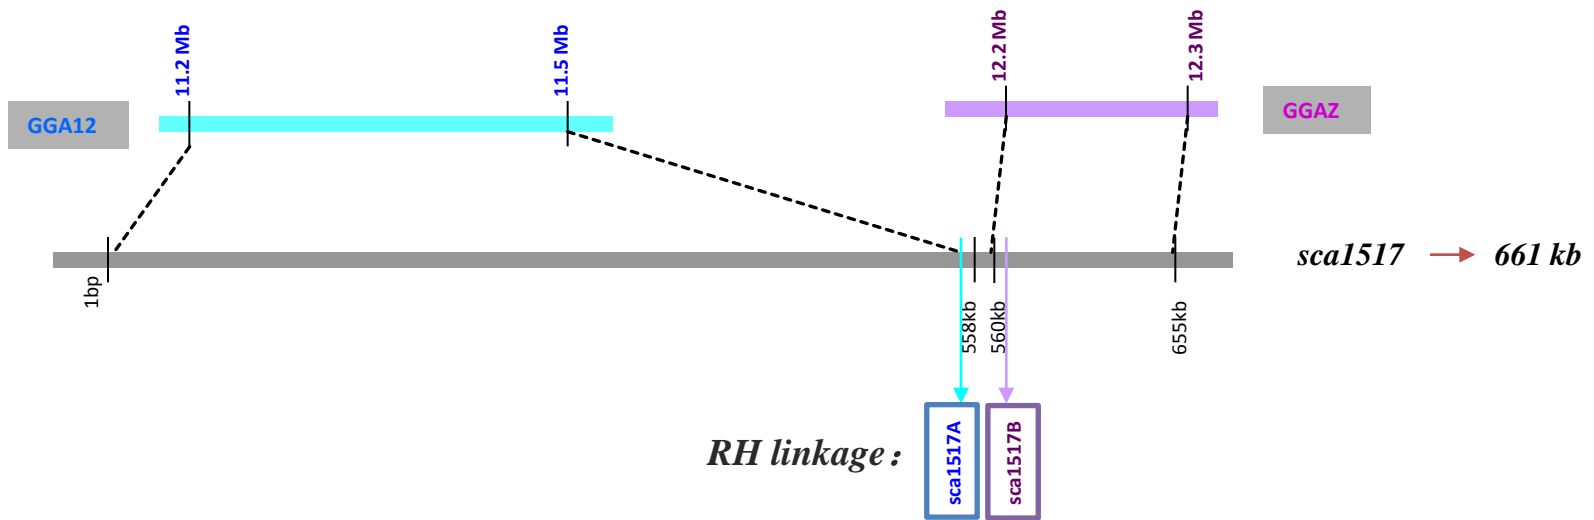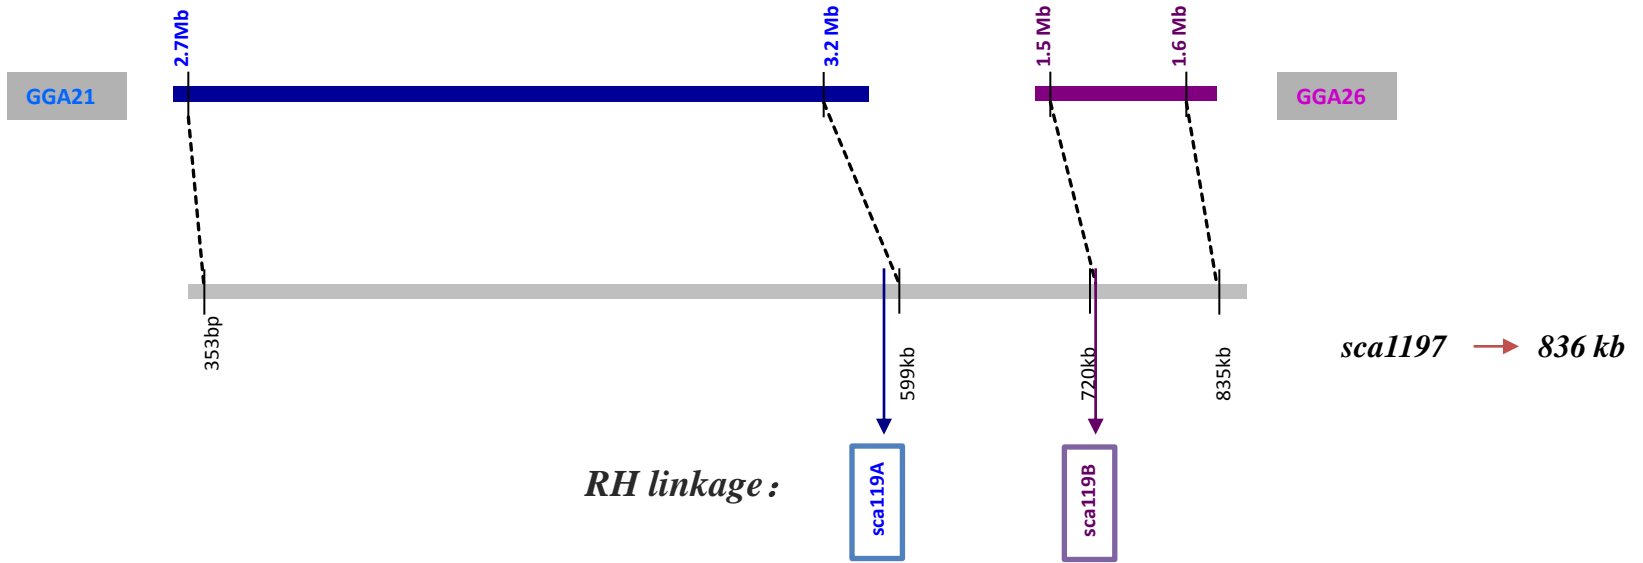

# Duck scaffolds aligning to two chicken chromosomes

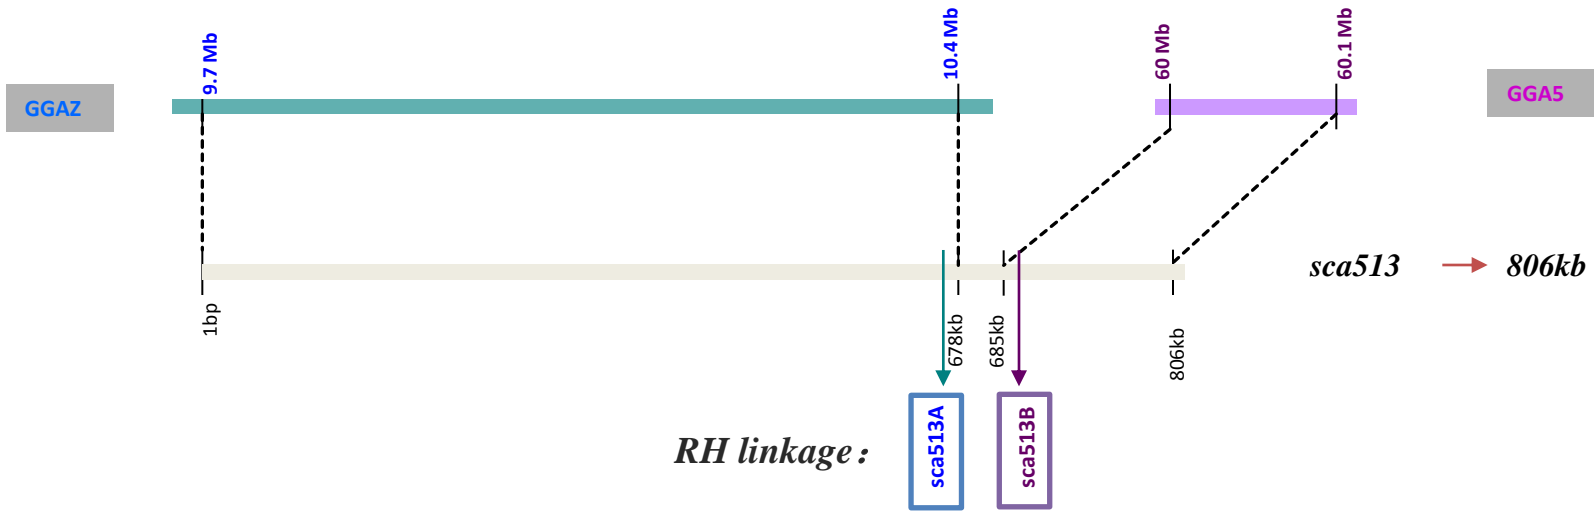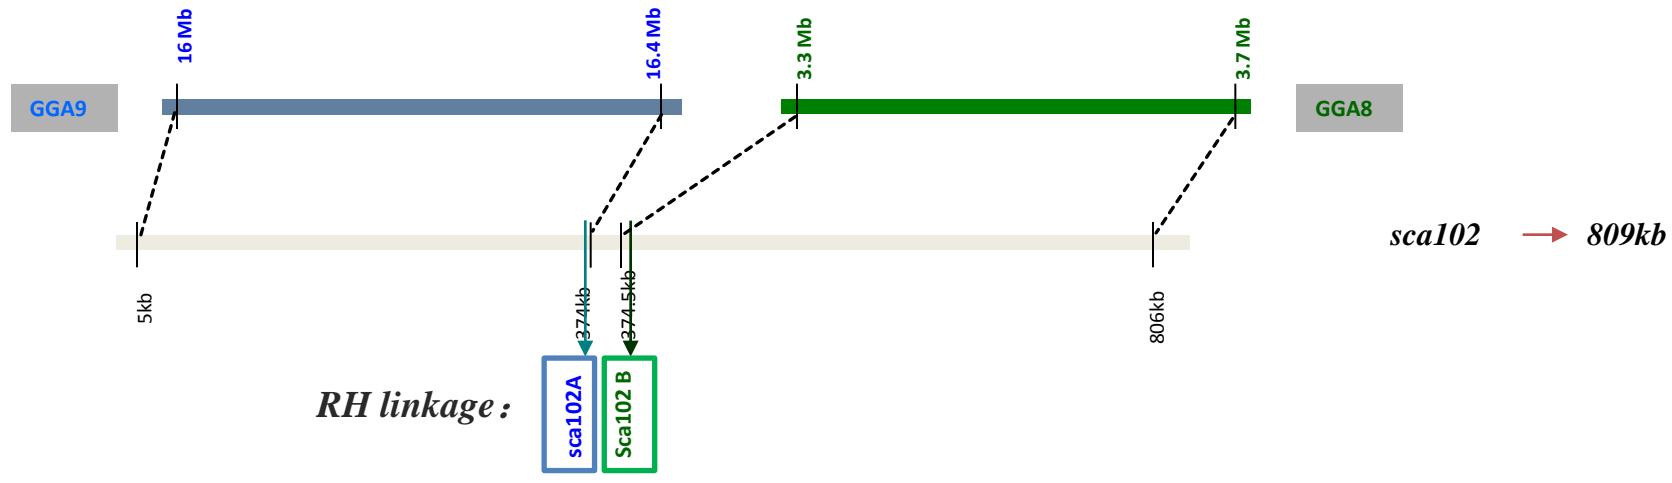

# Duck scaffolds aligning to two chicken chromosomes

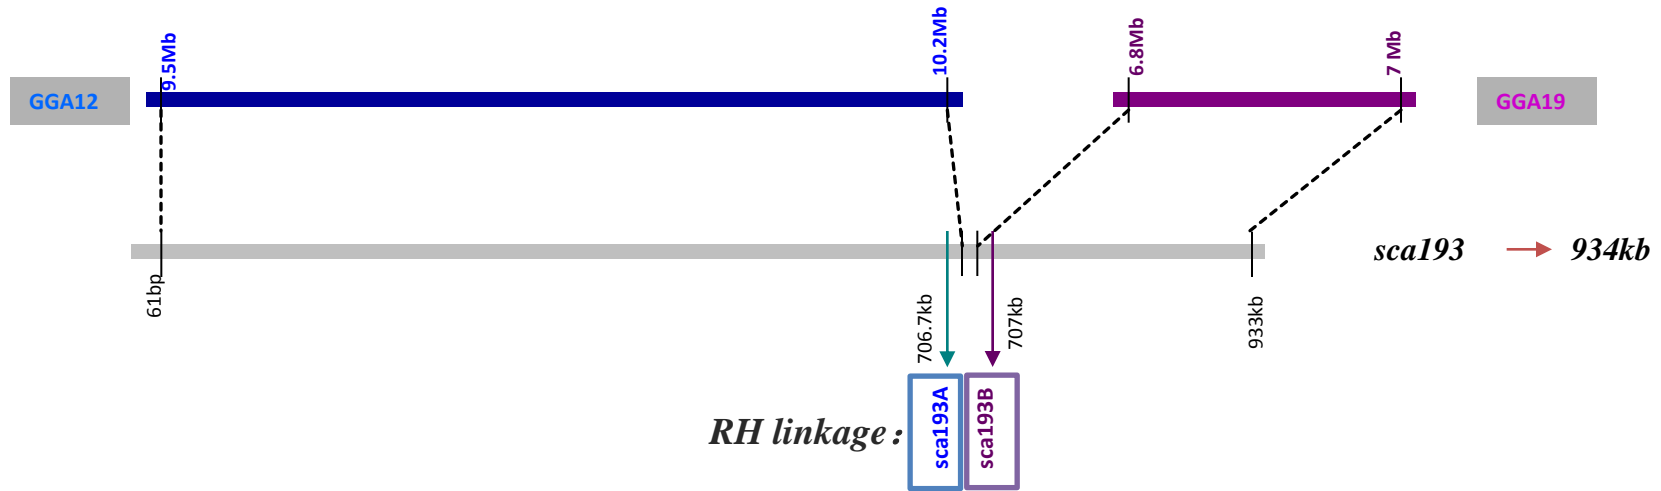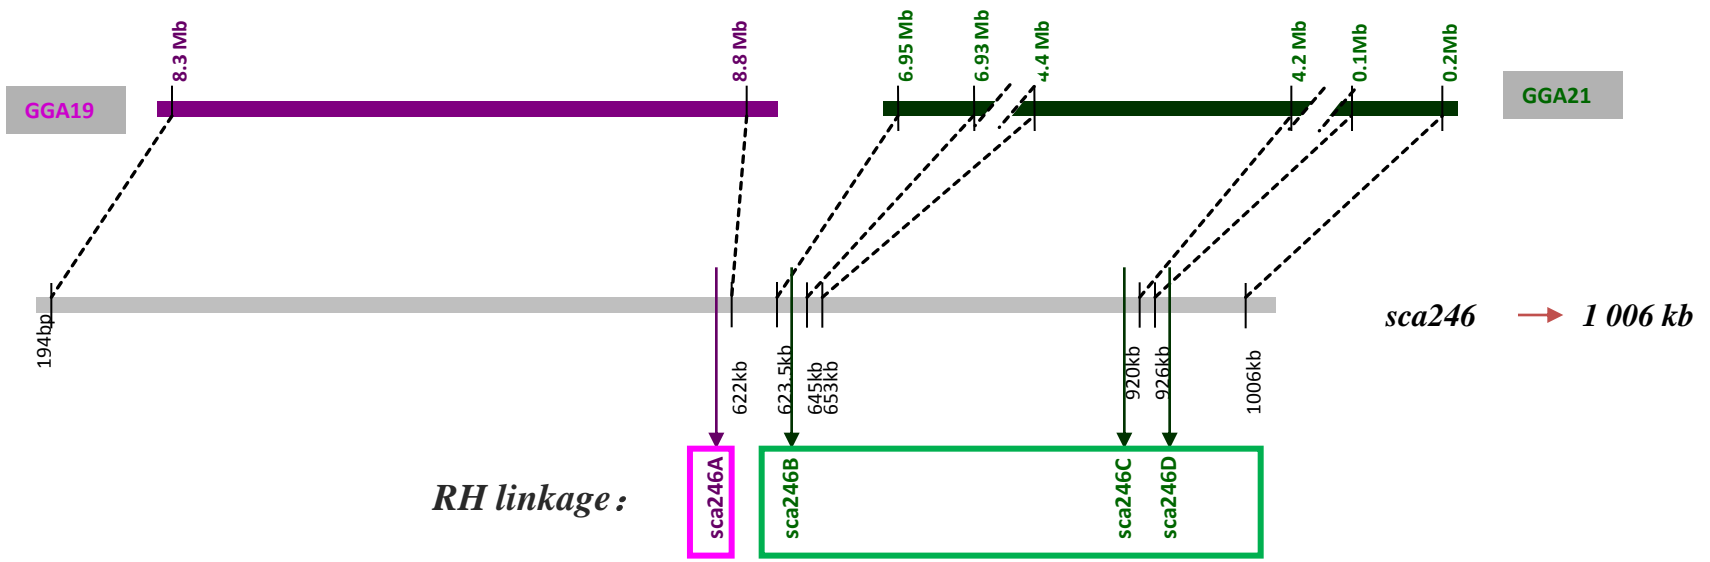



# Duck scaffolds aligning to two chicken chromosomes

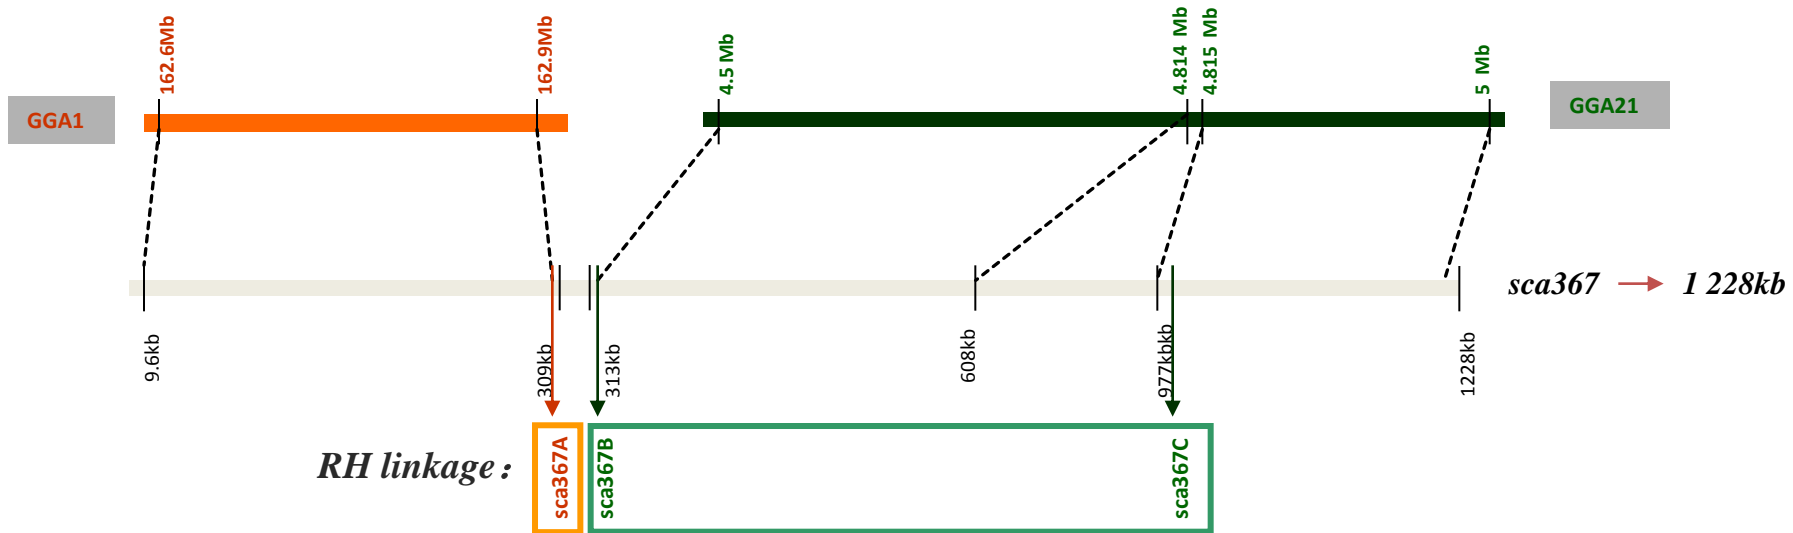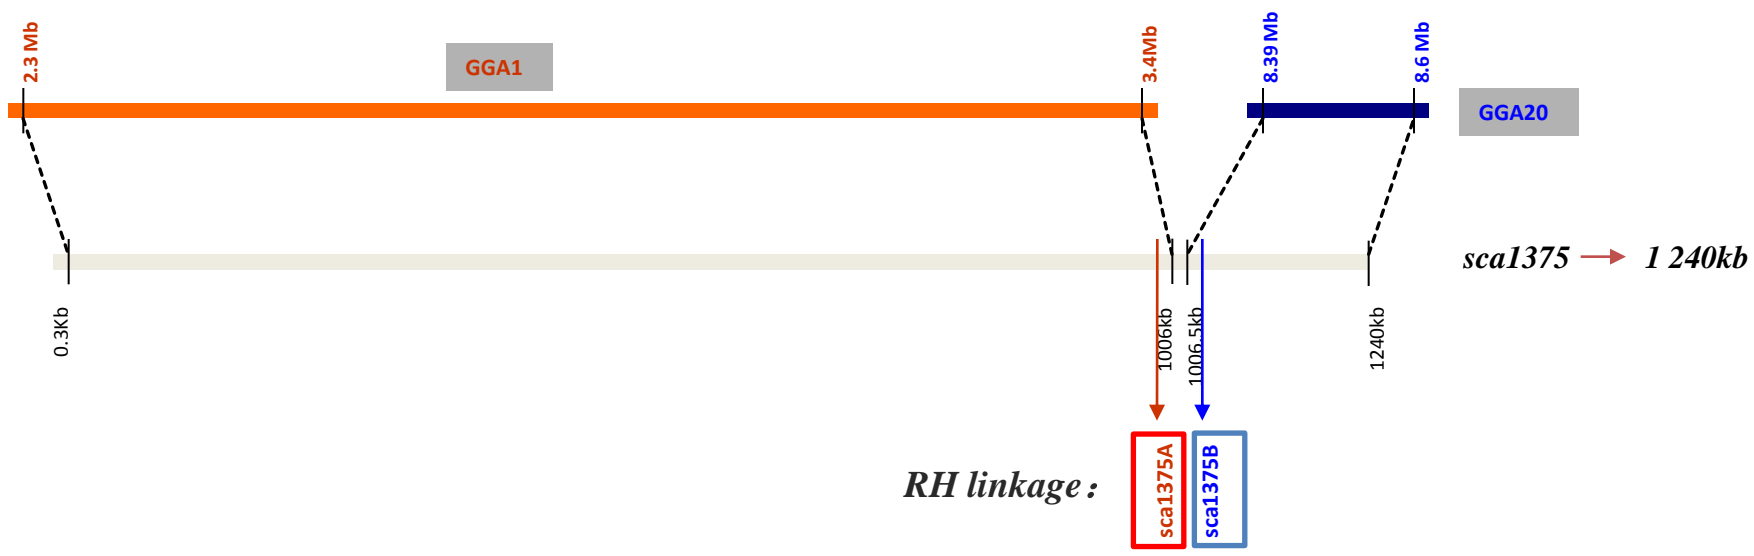

# Duck scaffolds aligning to two chicken chromosomes

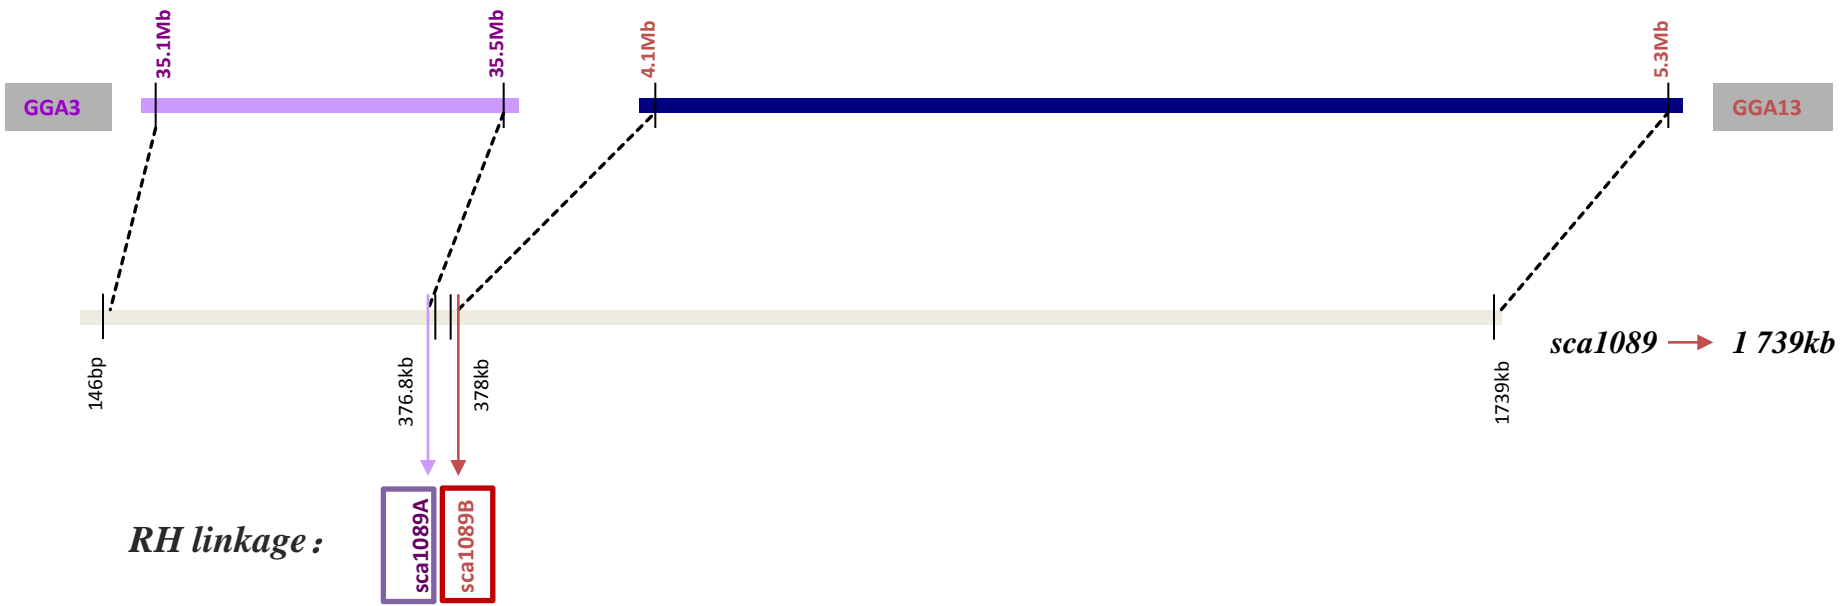

# Duck scaffolds aligning to two chicken chromosomes

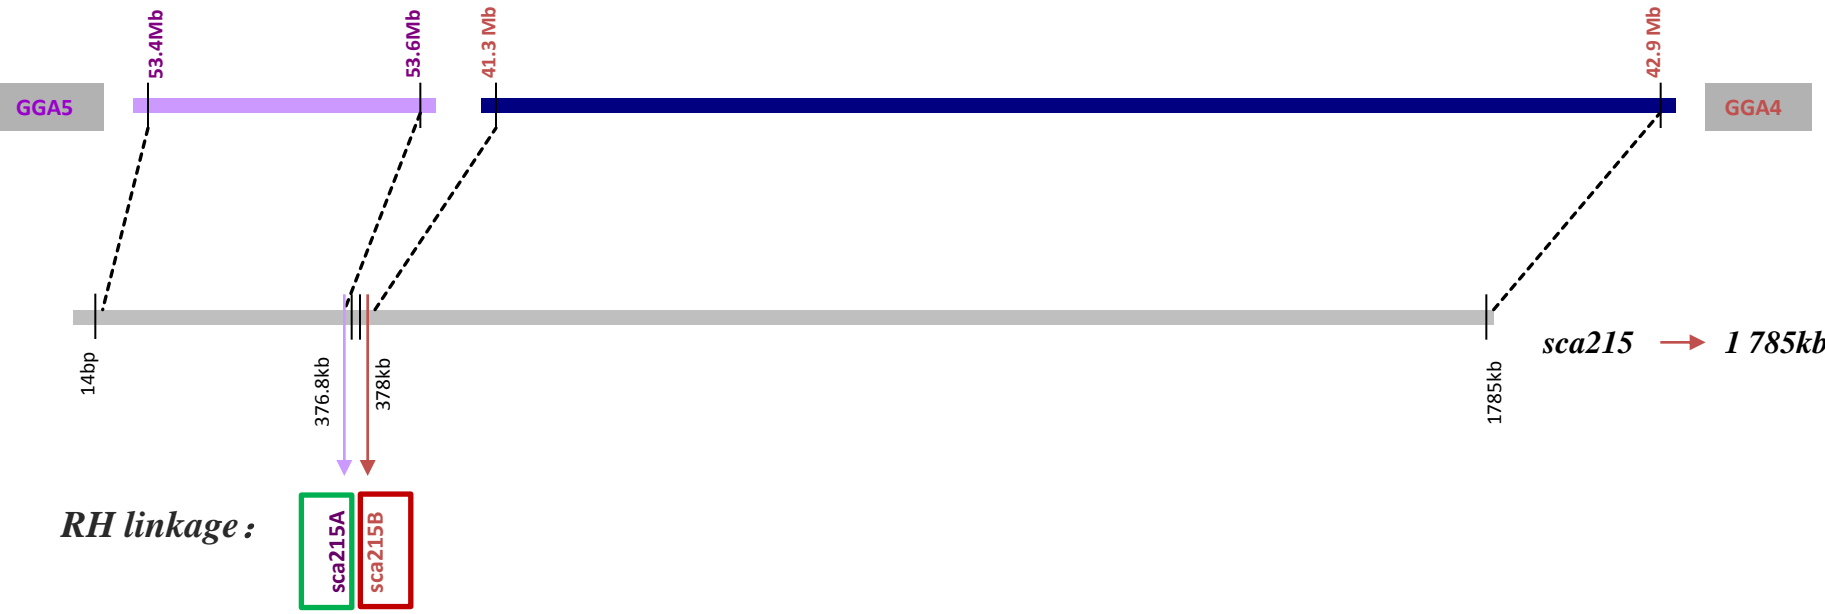

# Duck scaffolds aligning to two chicken chromosomes

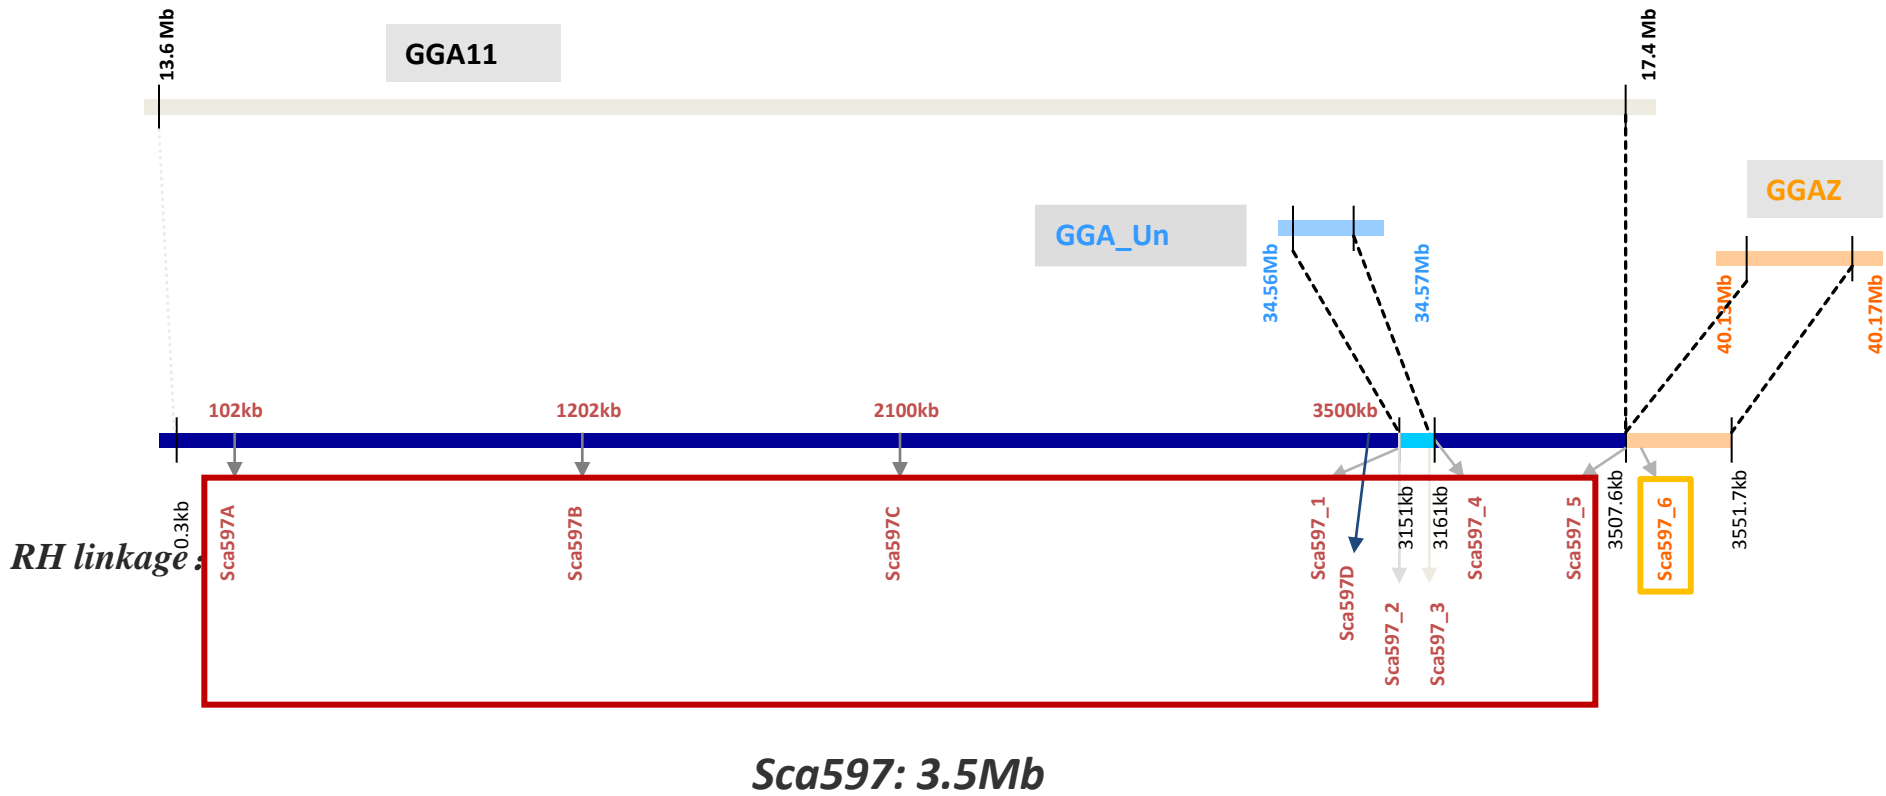

Scaffold597 was a large scaffold which was detected to be discontinuous as it could be mapped on different chicken chromosome as shown in the graph. The positions of all markers were also indicated. The coordinates on the breakpoints were given as well.
